# Supplementary material for: Preparation, characterization, and utilization of multi-functional magnetic-fluorescent composites for bio-imaging and magnetic hyperthermia therapy
Source: Royal Society of Chemistry journal article supplement (doi:10.1039/c3ra41002a), 2013-01-01
Supplement: c3ra41002a.pdf [file c3ra41002a.pdf]

## Supporting Information

for

### **Preparation, Characterization, and Utilization of Multi-functional Magnetic-fluorescent Composites for Bio-imaging and Magnetic Hyperthermia Therapy**

Supparesk Rittikulsittichai,<sup>1</sup> Burapol Singhana,<sup>1</sup> William W. Bryan,<sup>1</sup> Subhasis Sarangi,<sup>3</sup>

Andrew C. Jamison,<sup>1</sup> Audrius Brazdeikis,<sup>2,3,\*</sup> and T. Randall Lee<sup>1,3,\*</sup>

*Departments of Chemistry<sup>1</sup>, Physics<sup>2</sup> and the Texas Center for Superconductivity<sup>3</sup>*

*University of Houston, 4800 Calhoun Road, Houston, Texas 77204-5003*

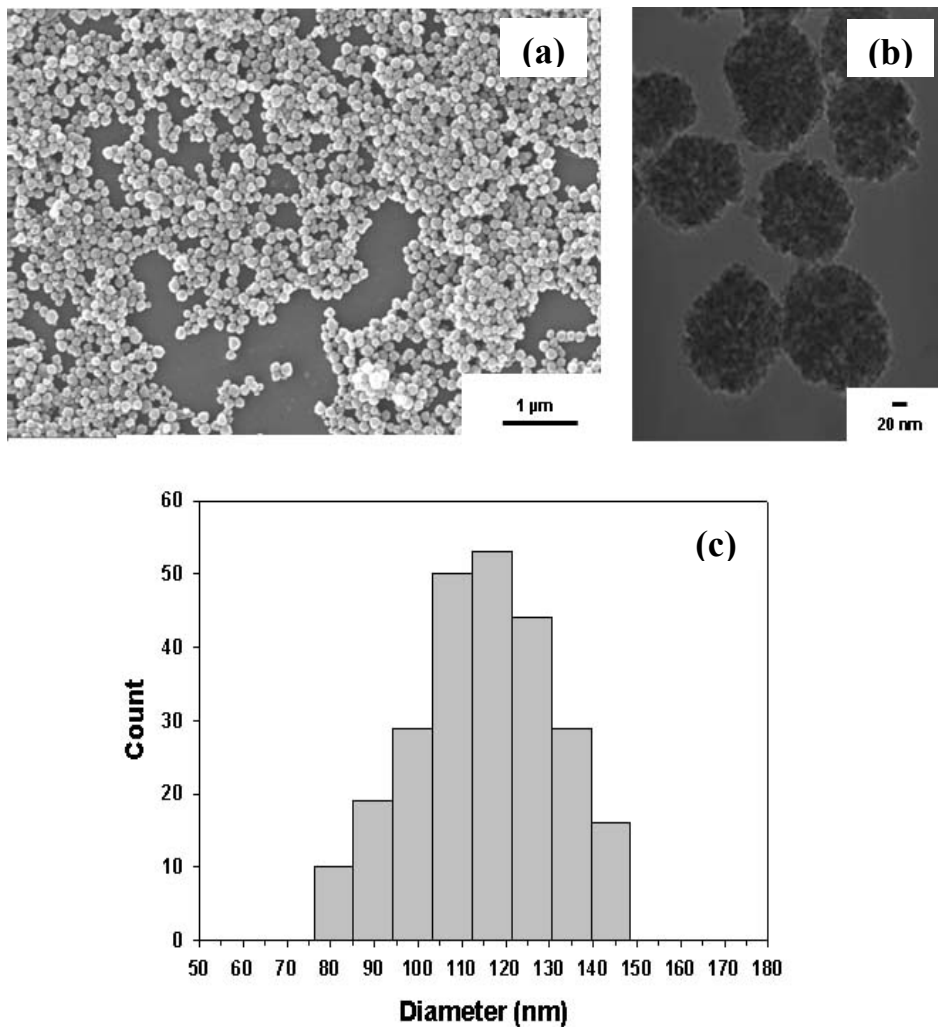

**Figure S1.** Uncoated  $\text{Fe}_3\text{O}_4$  nanoparticles imaged by (a) FE-SEM and (b) TEM, and (c) the size distribution of  $\text{Fe}_3\text{O}_4$  nanoparticles evaluated by measuring ~250 nanoparticles as derived from the SEM image.

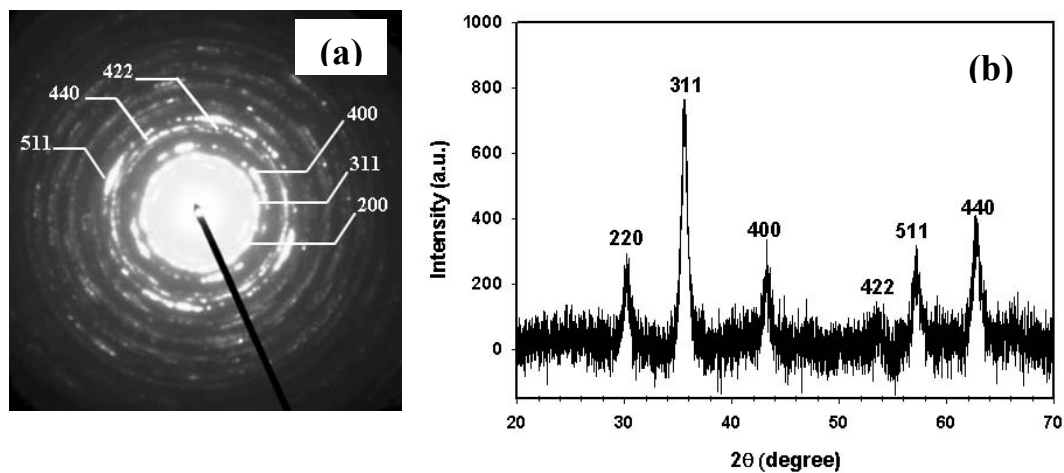

**Figure S2.** (a) SAED ring pattern and (b) XRD pattern of  $\text{Fe}_3\text{O}_4$  nanoparticles.

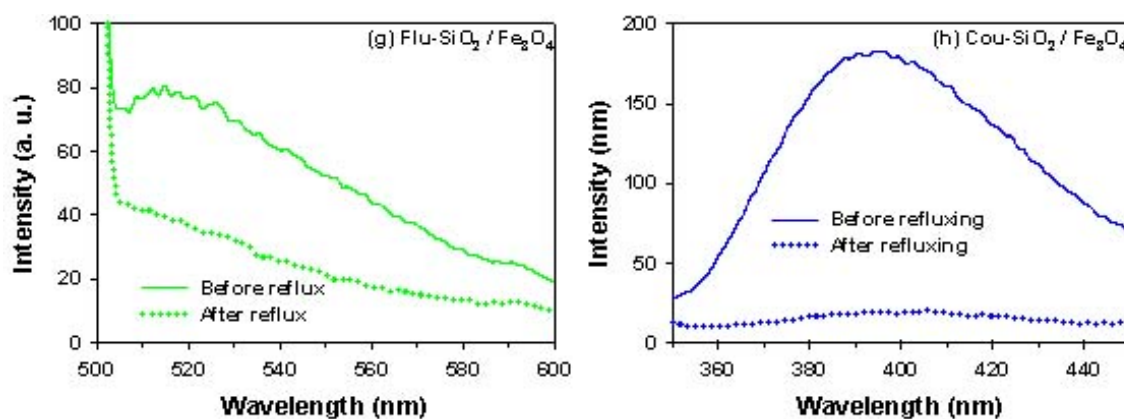

**Figure S3.** A higher magnification of the emission spectra of (g) Flu-SiO<sub>2</sub> / Fe<sub>3</sub>O<sub>4</sub> nanoparticles and (h) Cou-SiO<sub>2</sub> / Fe<sub>3</sub>O<sub>4</sub> nanoparticles, before and after being refluxed in water.

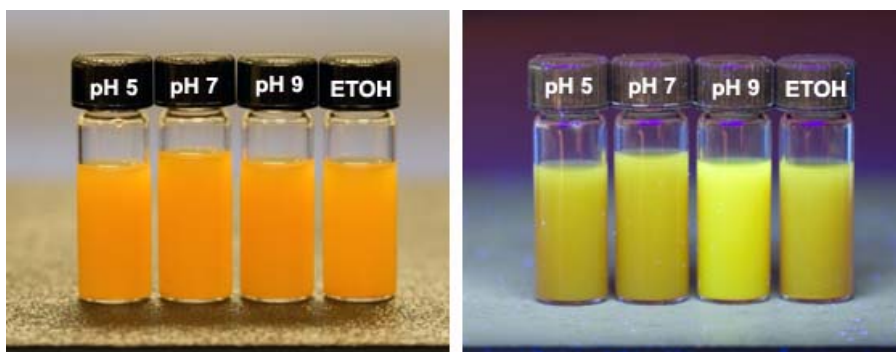

**Figure S4.** Photographs of Flu-SiO<sub>2</sub> / Fe<sub>3</sub>O<sub>4</sub> nanoparticles dispersed in water at various pH and in ethanol, under white light (left image) and UV light irradiation (right image).
